# Supplementary material for: DECIPHeR-GW v1: a coupled hydrological model with improved representation of surface–groundwater interactions
Source: Copernicus journal article supplement (doi:10.5194/gmd-18-4247-2025), 2025-07-15
Supplement: Supplementary file 1 [file gmd-18-4247-2025-supplement.pdf]

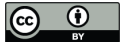

*Supplement of*

## **DECIPHeR-GW v1: a coupled hydrological model with improved representation of surface–groundwater interactions**

**Yanchen Zheng et al.**

*Correspondence to:* Yanchen Zheng ([yanchen.zheng@bristol.ac.uk](mailto:yanchen.zheng@bristol.ac.uk))

The copyright of individual parts of the supplement might differ from the article licence.

**Text S1. Summary of existing surface-groundwater coupled models**

Table S1 summarizes a variety of current groundwater-surface water coupled models across different scales.

**Table S1. Summary of existing surface-groundwater coupled models across different scales.**

| Models              | Application domain                                                                                                    | Coupling method                                     | Model structures                                                         | Surface-groundwater interactions                                      | Groundwater Recharge                                  | Lateral flow    | Groundwater head | Groundwater use                                            | Evaluation against groundwater data                                          | Model calibration                                                          | Computation time                                                                                                    | Reference                                    |
|---------------------|-----------------------------------------------------------------------------------------------------------------------|-----------------------------------------------------|--------------------------------------------------------------------------|-----------------------------------------------------------------------|-------------------------------------------------------|-----------------|------------------|------------------------------------------------------------|------------------------------------------------------------------------------|----------------------------------------------------------------------------|---------------------------------------------------------------------------------------------------------------------|----------------------------------------------|
| SWAT-MODFLOW        | semi-arid region, Sprague River Watershed (4100 km <sup>2</sup> ), Oregon, USA                                        | Two way coupling                                    | SWAT, HRU-based; MODFLOW, grid cells                                     | Represented                                                           | pass SWAT HRU-calculated deep percolation as recharge | Represented     | Represented      | Not represented                                            | Yes; compare with observed average groundwater discharge                     | Yes                                                                        | The simulation requires approximately 11 h for the 34-year period simulation period for their study basin.          | Bailey et al. (2016)                         |
| TopNet-GW           | Pareora catchment, Canterbury region, New Zealand (530 km <sup>2</sup> )                                              | Groundwater is represented as an additional storage | Catchment scale; Add additional layers of groundwater stores             | Represented                                                           | No                                                    | Not represented | Not represented  | Not represented                                            | No                                                                           | Yes                                                                        | Not mentioned                                                                                                       | Yang et al. (2017); (Griffiths et al., 2023) |
| mHM-OGS             | central European mesoscale river basin – Nängelstedt (850 km <sup>2</sup> )                                           | Two way coupling                                    | Grid-based; OGS acts as a plug-in to the original mHM modeling framework | Not represented                                                       | mHM simulated recharge                                | Not represented | Represented      | Not represented                                            | Yes; match with long-term mean of observed groundwater levels from 19 wells. | Yes                                                                        | Not mentioned                                                                                                       | Jing et al. (2018)                           |
| CWatM-MODFLOW       | Seewinkel region in Austria (573 km <sup>2</sup> ), Upper Bhima basin in India (basin area is 46000 km <sup>2</sup> ) | Two way coupling                                    | Both grid-based. 1km for CWatM, 100-250m for MODFLOW                     | Represented                                                           | CWatM simulates the groundwater recharge              | Represented     | Represented      | Represented, compare the model with and without irrigation | Yes, compare against 62 and 351 boreholes for Seewinkel and Bhima            | Yes                                                                        | Only the GW model simulation for Bhima basin at a 100m resolution lasts around 2 d versus 9 h at a 250m resolution. | Guillaumot et al. (2022)                     |
| GSFLOW-GRASS/GSFLOW | 3 catchments, areas range from 12.5 to 3723 km <sup>2</sup>                                                           | Two way coupling                                    | PRMS HRUs scale and grid-based MODFLOW                                   | Represented, especially groundwater interacted with streams and lakes | Represented                                           | Represented     | Represented      | Not represented                                            | No                                                                           | Uncalibrated for the test cases, but can be calibrated after proper setup. | The GSFLOW runtime is sensitive to the MODFLOW resolution rather than the surface domain resolution                 | Markstrom et al. (2008); (Ng et al., 2018)   |

| Models         | Application domain                                                   | Coupling method                                                         | Model structures                            | Surface-groundwater interactions                                                                                           | Groundwater Recharge | Lateral flow    | Groundwater head | Groundwater use | Evaluation against groundwater data                            | Model calibration                                                                  | Computation time                                  | Reference                                          |
|----------------|----------------------------------------------------------------------|-------------------------------------------------------------------------|---------------------------------------------|----------------------------------------------------------------------------------------------------------------------------|----------------------|-----------------|------------------|-----------------|----------------------------------------------------------------|------------------------------------------------------------------------------------|---------------------------------------------------|----------------------------------------------------|
| JULES-GFB      | Two synthetic experiments and 6 neighbouring UK catchments           | Two way coupling                                                        | Grid-based; JULES is the land surface model | Represented                                                                                                                | Represented          | Represented     | Represented      | Not represented | No                                                             | Yes                                                                                | Not mentioned                                     | Batelis et al. (2020)                              |
| SHETRAN        | Lambourne catchment over a Chalk aquifer                             | Two way coupling                                                        | Grid-based;                                 | Represented as a sine curve, with recharge seasonality, mean annual recharge serving as input variables                    | Represented          | Not represented | Represented      | Represented     | No                                                             | Yes                                                                                | Not mentioned                                     | Ewen et al. (2000); (Parkin et al., 2007)          |
| CLSM-TOPMODEL  | The Somme River catchment in France (5566 km <sup>2</sup> )          | Groundwater is represented as a storage reservoir                       | Grid-based;                                 | Not represented                                                                                                            | Represented          | Not represented | Not represented  | Not represented | No                                                             | Yes, calibrated with observed streamflow                                           | Not mentioned                                     | Gascoin et al. (2009)                              |
| CaWaQS 3.02    | The Seine River basin (~76000km <sup>2</sup> )                       | GW is coupled as a module, based on the pseudo-3-D diffusivity equation | Grid-based;                                 | Not represented                                                                                                            | Represented          | Not represented | Represented      | Represented     | Yes, compare with 340 groundwater head observation time series | Yes, calibrated in 384 river stations                                              | Not mentioned                                     | Flipo et al. (2023)                                |
| ORCHIDEE       | Five major sub-basins in Amazon                                      | One way coupling, groundwater is represented as a slow reservoir        | Grid-based;                                 | Not represented                                                                                                            | Represented          | Not represented | Not represented  | Not represented | No                                                             | Yes                                                                                | Not mentioned                                     | Guimbertau et al. (2014)                           |
| HydroGeoSphere | A montane catchment (3.2 km <sup>2</sup> ) in the Scottish Highlands | Two way coupling                                                        | Grid-based;                                 | Represented, the interaction is simulated by using a 2D and the 3D form of Richards's equation for variably saturated flow | Represented          | Represented     | Represented      | Not represented | Yes                                                            | Yes, calibrated against streamflow, evapotranspiration and also groundwater levels | Calibration time for this case study is 2-3 days. | Brunner and Simmons (2012); (Ala-Aho et al., 2017) |

| Models                      | Application domain                                                        | Coupling method                                                                                                             | Model structures                                                             | Surface-groundwater interactions | Groundwater Recharge                                                                  | Lateral flow    | Groundwater head | Groundwater use | Evaluation against groundwater data                | Model calibration                                                | Computation time                                                                                             | Reference                                      |
|-----------------------------|---------------------------------------------------------------------------|-----------------------------------------------------------------------------------------------------------------------------|------------------------------------------------------------------------------|----------------------------------|---------------------------------------------------------------------------------------|-----------------|------------------|-----------------|----------------------------------------------------|------------------------------------------------------------------|--------------------------------------------------------------------------------------------------------------|------------------------------------------------|
| ParFlow-CLM                 | Continental scale, Europe domain at 3km resolution (1544*1592 grid cells) | Two way coupling                                                                                                            | Grid-based; ParFlow is coupled to CLM                                        | Represented                      | Represented                                                                           | Represented     | Represented      | Not represented | Yes, compare the water table depth anomalies       | No, uncalibrated                                                 | Not mentioned                                                                                                | Naz et al. (2022)                              |
| ParFlow                     | Continental US                                                            | Two way coupling                                                                                                            | Grid-based; ParFlow is an integrated subsurface and surface hydrologic model | Represented                      | Represented                                                                           | Represented     | Represented      | Not represented | Yes, compare simulated and observed hydraulic head | No, uncalibrated                                                 | The entire simulation utilized 2.5M core hours of compute time, less than 1 week of wall-clock time (~150 h) | Maxwell et al. (2015)                          |
| WaterGAP2.2                 | Global                                                                    | Groundwater is represented as a storage                                                                                     | Grid-based;                                                                  | Not represented                  | Represented, the groundwater recharge is calculated as a fraction of runoff from land | Not represented | Not represented  | Represented     | No                                                 | Yes, calibrated against mean annual discharge of the 1319 basins | Not mentioned                                                                                                | Müller Schmied et al. (2014)                   |
| WaterGAP2-G <sup>3</sup> M  | Global                                                                    | One way coupling, the model can only simulate the GW discharge to surface water, but not recharge from surface water to GW. | Grid-based;                                                                  | Represented                      | Not represented                                                                       | Represented     | Represented      | Not represented | Yes                                                | No, uncalibrated                                                 | G3M can compute the presented steady-state solution on a computer with four cores in about 30min.            | Reinecke et al. (2019)                         |
| GLOBGM (PCR-GLOBWB-MODFLOW) | Global                                                                    | One way coupling                                                                                                            | Grid-based;                                                                  | Represented                      | Represented                                                                           | Represented     | Represented      | Represented     | Yes                                                | No, uncalibrated                                                 | The daily simulation for the years 1958-2015 requires around 4.5 months.                                     | De Graaf et al. (2017); (Verkaik et al., 2022) |

**Text S2. The spatial mapping conversion of the state and flux variables across HRU scale and groundwater grid scale in the coupled model**

10 Since the recharge is calculated at the HRU scale based on the position of groundwater head, the storage and the depth of root zone (Figure 2 and equation (2) of the main paper), the gridded groundwater head needs to be transferred from grid cell to HRU scale. We adopt the area-weighted method to convert this state variable groundwater head. In Figure S1,  $H_1, H_2, \dots, H_4$  represents the groundwater heads at grid scale. The green shaded HRU is divided into four parts by these four groundwater grid cells. Each grid cell's groundwater head value was weighted by the proportion of its overlaid area within the HRU boundary ( $\frac{A_i}{A_{HRU}}$ ). The HRU-scale groundwater head is then calculated as the sum of these area-weighted values ( $\frac{A_i}{A_{HRU}} * H_i$ ) across all grid cells within the HRU. This HRU-scale groundwater head is subsequently used to compare with the topography and the bottom of the root zone for calculating the recharge.

**$H_{GW}$  — area-weighted method**

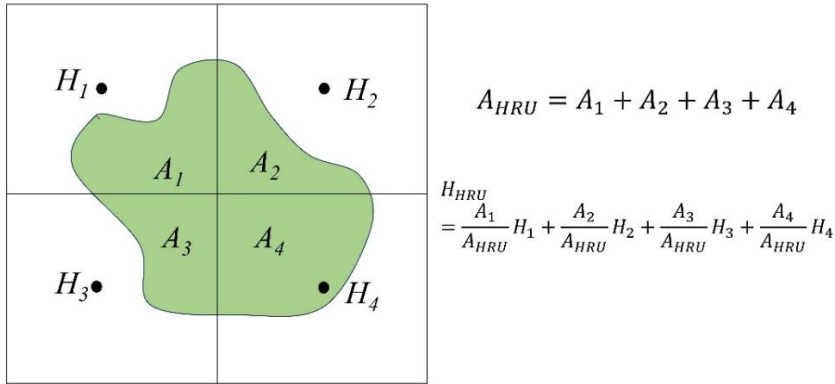

20 **Figure S1: Schematic demonstrating the conversion of the state variables, i.e., groundwater heads ( $H_{GW}$ ), from the groundwater grid scale to HRU scale. The grid cells are the groundwater model domain, while the green shaded area represents the HRU.**

After the HRU-scale recharge is derived, this flux variable must be converted to the grid scale to serve as an input for the groundwater system component (Figure S2). We followed the principle of water volume conservation. The total recharge volume for each groundwater grid is obtained by summing the products of the recharge volume of each HRU ( $A_{HRU_i} * Q_{RCHRU_i}$ ) and the proportion of its overlap with the groundwater grid ( $\frac{A_i}{A_{HRU_i}}$ ). This total recharge volume is then divided by the area of the groundwater grid ( $A_{GW}$ ) to determine the recharge flux ( $Q_{RC(GW)}$ ) for that grid.

## $Q_{RC}$ recharge — HRU to GW grid scale

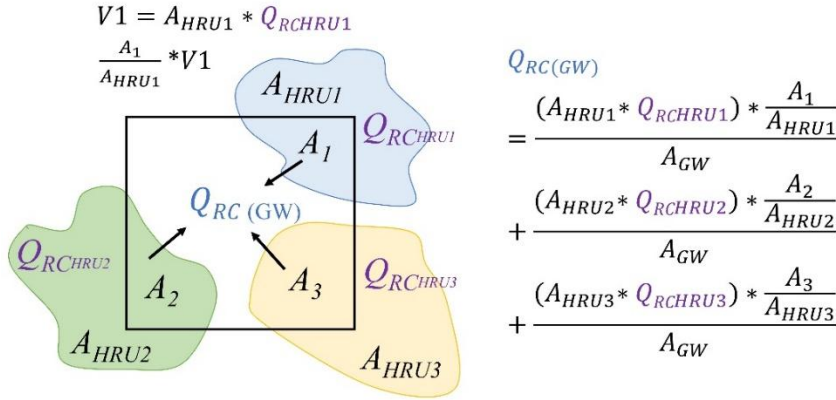

**Figure S2: Simplified diagram for illustrating the conversion of HRU scale recharge flux to the groundwater grid scale.**

- 30 Similarly, the grid-scale groundwater discharge is generated from the groundwater components, and this flux needs to be transferred to HRU scale for giving back to the surface water components for river routing. Figure S3 details our specific approach to achieve this conversion. To conserve mass, we assume that the groundwater discharge of each groundwater grid will be completely drained by the overlapping HRUs. If the groundwater grid is overlayed with multiple HRUs, the total groundwater discharge volume from the grid cell will be distributed among these HRUs according to their respective area
- 35 proportions within the grid cell. Taking Figure S3 as an example, the groundwater grid 1 overlaps with two HRUs, with the total area of their overlap being the sum of  $A_{1-1}$  and  $A_{2-1}$ . Thus, HRU1 can obtain the discharge contributed by groundwater grid 1 by multiplying the HRU1's overlayed area proportion ( $\frac{A_{1-1}}{A_{1-1} + A_{2-1}}$ ) and the volume of groundwater discharge volume for grid 1 ( $A_{GW} * Q_{GWD S1}$ ). As groundwater grid 2 overlaps exclusively with HRU1, all the groundwater discharge volume from this grid will be allocated to HRU1 ( $A_{GW} * Q_{GWD S1} * \frac{A_{1-2}}{A_{1-2}}$ ). For HRU1, the HRU-scale groundwater discharge flux
- 40 ( $Q_{GWD S(HRU)}$ ) is determined by summing the proportionally distributed discharge amounts from all overlapping groundwater grid cells and then dividing by the area of the HRU1.

### $Q_{GWDS}$ , GW discharge — GW grid to HRU scale

$$A_{overlay1} = A_{1-1} + A_{2-1}$$

$$A_{overlay2} = A_{1-2}$$

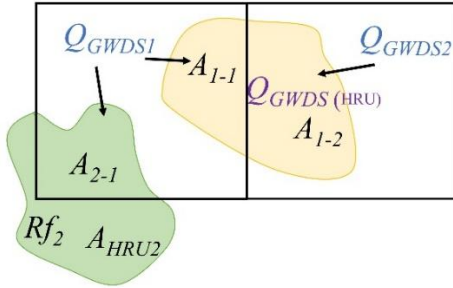

$$Q_{GWDS(HRU)} = \frac{(A_{GW} * Q_{GWDS1}) * \frac{A_{1-1}}{A_{1-1} + A_{2-1}}}{A_{HRU1}} + \frac{(A_{GW} * Q_{GWDS2}) * \frac{A_{1-2}}{A_{1-2}}}{A_{HRU1}}$$

**Figure S3: Diagram illustrating the conversion of groundwater discharge flux from grid scale to the HRU scale.**

#### **Text S3. Water balance checks**

- 45 Three different categories of water balance checks were implemented to verify that mass is conserved in the coupled model. The first type of water balance checks were employed to ensure the correct transfer of recharge ( $Q_{RC}$ ) and groundwater discharge ( $Q_{GWDS}$ ) fluxes between the HRU scale and groundwater grid cells. To be specific, at each time step, we calculated and ensured that the relative error between the recharge volume obtained by multiplying the recharge value at the HRU-scale with the corresponding HRU area and the volume that are converted from the grid-scale recharge is less than  $10^{-6}$ .
- 50 Secondly, for the surface component of the coupled model, we conducted the water balance checks for each HRU at every time steps, as shown in the Equation (1). The principle of Equation (1) is conservation of mass of the surface component. The water entering the surface component (via precipitation  $P$ ) and stored in the catchment (initialized  $SRZ_{init}$ ) must balance with the sum of the outputs, which include actual evapotranspiration ( $ET$ ), recharge leaked to the groundwater system ( $Q_{RC}$ ), surface excess flow ( $Q_{EX}$ ) and water retained in the catchment at the last time step ( $SRZ_{end}$ ).
- 55 Equation (2)-(3) present the water balance checks for the groundwater component of the coupled model. We adopted separate water balance check equations for surface and groundwater components because their corresponding fluxes and variables are at different scales (i.e., HRU-scale against grid-scale), and also at different domains (i.e., catchment domain and groundwater grid domain). The groundwater balance checks were performed to ensure that the accumulated recharge volume across all time steps minus the accumulated groundwater discharges volume equals the changes in groundwater
- 60 heads. Since deriving the groundwater heads involve solving the large sets of algebraic equations, which usually uses the iterative techniques to obtain an approximation solution with specified tolerance (Reilly and Harbaugh, 2004). For example, we adopt the preconditioned conjugate gradient solver to compute the groundwater heads matrix, configured with 1500 iteration maximum number and a tolerance of  $10^{-6}$ m. Careful mass balance check is critical to ensure the physical meaning

of the mathematical solution. In this study, the water balance error  $error_{groundwater}$  was calculated by dividing the long-term groundwater balance deviations with the accumulated recharge volume. If this ratio is less than 1%, then we assumed that the groundwater component is water balanced.

$$wbal_{surface} = P - ET + (SRZ_{init} - SRZ_{end}) - Q_{RC} - Q_{EX}, \quad (1)$$

$$wbal_{groundwater} = \sum_{t=1}^n Q_{RC} * A_{GW} - \sum_{t=1}^n Q_{GWDS} * A_{GW} - (H_{end} - H_{init}) * S_y * A_{GW}, \quad (2)$$

$$error_{groundwater} = \frac{wbal_{groundwater}}{\sum_{t=1}^n Q_{RC}}, \quad (3)$$

where,  $wbal_{surface}$  indicates the water balance deviations for the surface component, while  $wbal_{groundwater}$  denotes the water balance deviations for the groundwater component.  $P$ ,  $ET$  is the precipitation and actual evapotranspiration, respectively.  $SRZ_{init}$  and  $SRZ_{end}$  represents the root zone storage at the first and last time step.  $Q_{EX}$  is the excess flow to the river channel.  $Q_{RC}$  is the recharge value leaked to the groundwater system, whereas  $Q_{GWDS}$  denotes the groundwater discharges.  $n$  is the total time step.  $H_{init}$  and  $H_{end}$  represents the groundwater heads at the first and last time step.  $A_{GW}$  is the area of the groundwater simulation domain.  $S_y$  is the specific yield.

#### **Text S4. Groundwater level data quality control process**

Groundwater level observation data from 3,888 groundwater wells in England and Wales were collected from the Environment Agency's groundwater monitoring network database, encompassing various temporal resolutions, temporal coverages, and data quality considerations. There are 3005 wells providing manually measured data (referred to as 'Dipped data') at daily or monthly intervals, and 883 wells provide automatically 'Logged data' recorded by pressure transducers at sub-daily scales. Moreover, 395 wells have both types of data available. The locations of these wells are depicted in Figure S4a. The temporal coverage ranges from a minimum of 4 years with non-continuous observations to a maximum of 188 years, with a median of 41 years (Figure S4c). Several quality control steps have been applied to the measured groundwater level data before used for the model evaluation, the workflow is shown in the Figure S4b.

Step 1: Given that the data quality indicators are also available with the timeseries data in the database. Only data labelled with 'Good' and 'Estimated' are selected for analysis.

Step 2: We exclude the data with z-score > 3.5 to remove some outliers in the groundwater level timeseries.

Step 3: We prefer to use the manual measured Dipped data in the analysis and also because we run the model at the daily scale. In cases where both types of data are accessible, we prioritize the use of Dipped data. If only Logged data is available for the well, we aggregate the sub-daily data to the daily scale.

Step 4: Wells with records spanning shorter time periods are excluded. Records must contain over 100 measurements and span a minimum of 8 years to be included in the analysis.

Step 5: Only the groundwater wells intersecting with our selected study catchments are included.

As a result, daily groundwater level measurements from a total of 1804 groundwater wells were used for the model evaluation.

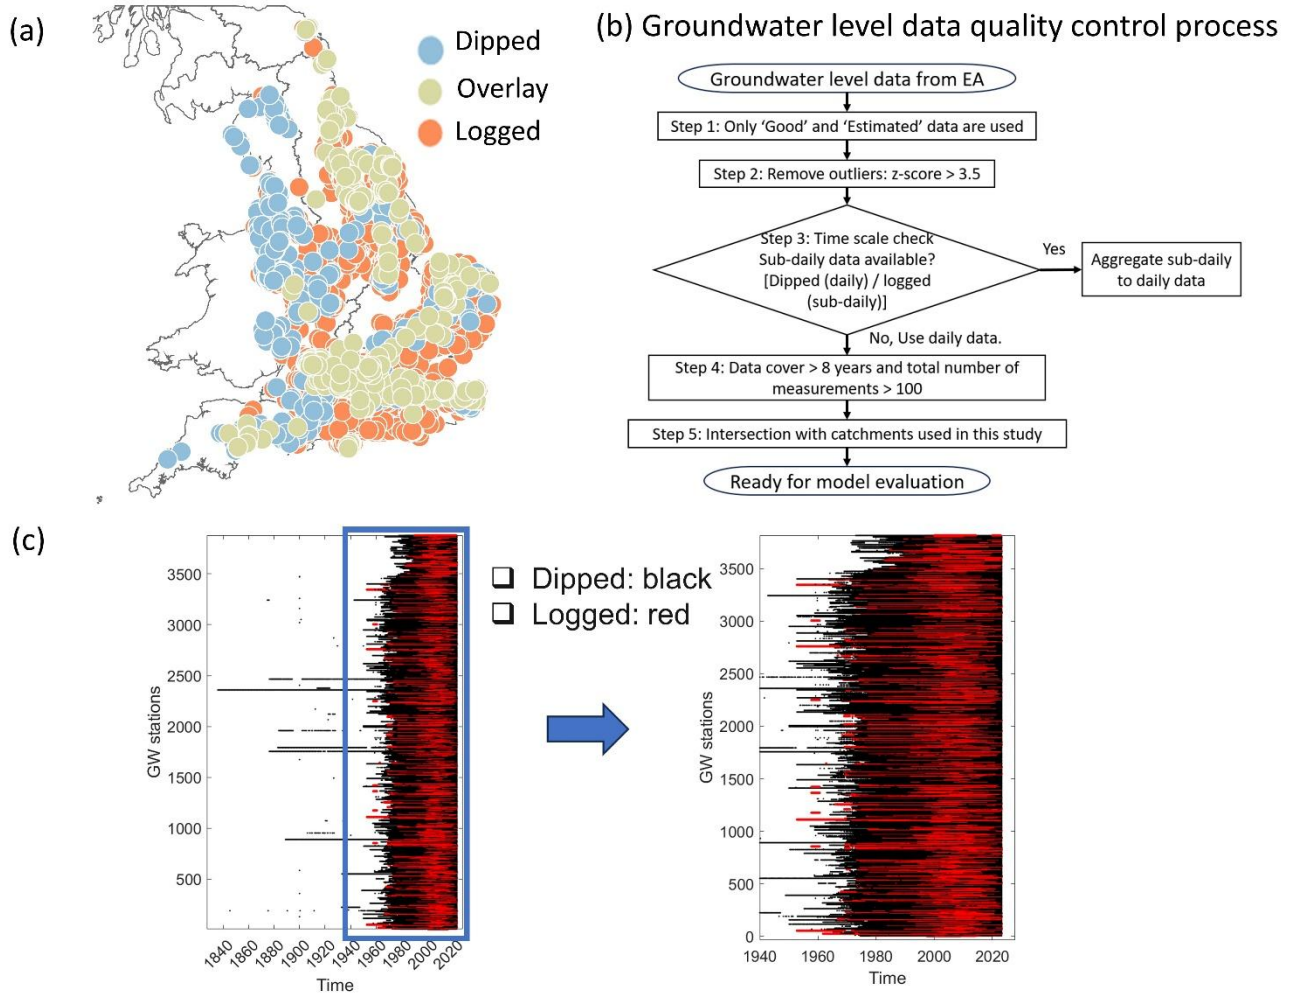

**Figure S4: (a) Map of 3888 groundwater wells, (b) groundwater level observations quality control process and (c) the temporal coverage of the groundwater level data.**

**Text S5. Ks and B parameter range for different soil texture classes**

Table S2 presents the lower and upper ranges for saturated hydraulic conductivity (Ks) and pore size distribution index (B) model parameters. These ranges are determined based on the studies from (Clapp and Hornberger, 1978; Rawls et al., 1982), which provides the field measured Ks and B soil sample values ranges for different soil texture classes.

**Table S2. The lookup table of Ks and B parameter ranges for different soil texture classes.**

| No_soil_class | Pore size distribution index<br>(B, -) |         | Saturated hydraulic conductivity<br>(Ks, m/d) |          | Soil texture    |
|---------------|----------------------------------------|---------|-----------------------------------------------|----------|-----------------|
|               | B_lower                                | B_upper | Ks_lower                                      | Ks_upper |                 |
| 1             | 0.01                                   | 1.93    | 0.504                                         | 15.206   | Sand            |
| 2             | 0.01                                   | 2.27    | 0.147                                         | 13.507   | Loamy sand      |
| 3             | 0.01                                   | 1.92    | 0.062                                         | 2.995    | Sandy loam      |
| 4             | 0.01                                   | 1.72    | 0.016                                         | 0.622    | Silt loam       |
| 5             | 0.01                                   | 1.79    | 0.032                                         | 0.600    | Loam            |
| 6             | 0.01                                   | 1.38    | 0.010                                         | 0.544    | Sandy clay loam |
| 7             | 0.01                                   | 1.21    | 0.004                                         | 0.147    | Silty clay loam |
| 8             | 0.01                                   | 0.99    | 0.006                                         | 0.212    | Clay loam       |
| 9             | 0.01                                   | 1.93    | 0.003                                         | 0.187    | Sandy clay      |
| 10            | 0.01                                   | 0.77    | 0.002                                         | 0.089    | Silty clay      |
| 11            | 0.01                                   | 0.90    | 0.001                                         | 0.111    | Clay            |

**Text S6. T and Sy parameter range for different lithological classes**

The lower and upper bounds of Transmissivity (T) and specific yield (Sy) for different lithological classes in England and Wales are presented in the Table S3. These parameters ranges are determined based on the study from Rahman et al. (2023). To be specific, the lower and upper bounds of Transmissivity (T) are taken from their Table S1. In cases where certain lithology types lack specific ranges, the lower and upper bounds are calculated by dividing or multiplying the estimated value by 50%. As for the specific yield (Sy), the lower and upper bounds are determined by increasing or decreasing an order of magnitude from the estimated value. The distribution of all these 101 lithological classes is presented in Figure S5.

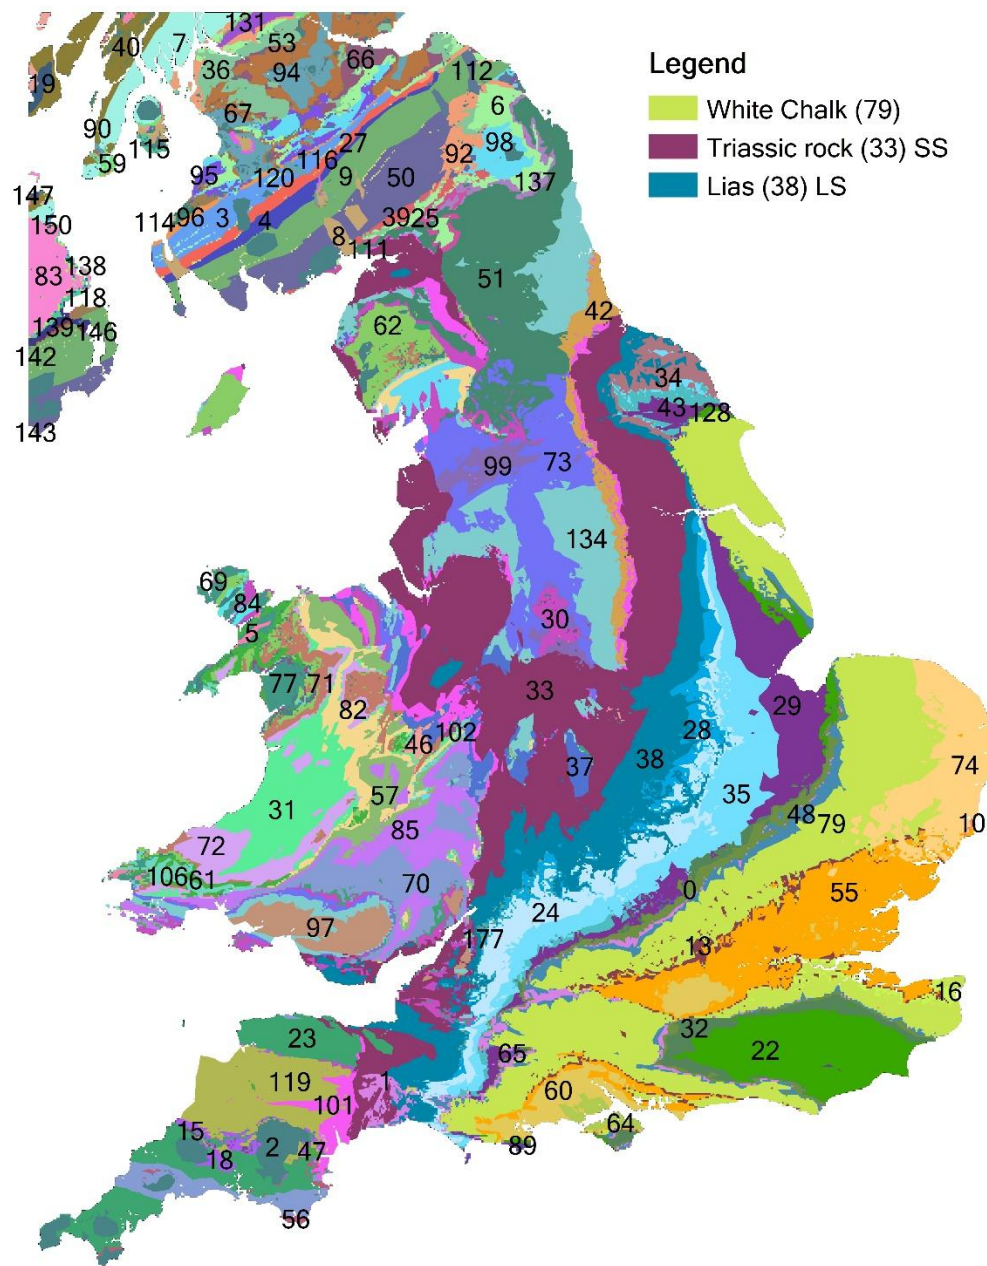

**Figure S5. Hydrogeological properties lithology type map produced by the British Geological Survey. Each number on the map corresponds to a specific lithology type as detailed in Table S3.**

**Table S3. Transmissivity (T) and specific yield (Sy) lower and upper bounds for different lithological classes in England and Wales.**

| No. | Lithological class<br>index in Figure<br>S5 | Transmissivity<br>(T, m <sup>2</sup> /d) |         | Specific yield<br>(Sy, - ) |          | Lithology name    |
|-----|---------------------------------------------|------------------------------------------|---------|----------------------------|----------|-------------------|
|     |                                             | T_lower                                  | T_upper | Sy_lower                   | Sy_upper |                   |
| 1   | 0                                           | 25                                       | 75      | 0.00173                    | 0.1      | Gault clay        |
| 2   | 1                                           | 1.24                                     | 1565    | 0.003                      | 0.1      | Upper greensand   |
| 3   | 2                                           | 0.1                                      | 1       | 0.00004                    | 0.004    | Igneous           |
| 4   | 3                                           | 0.7                                      | 2.1     | 0.01                       | 0.1      | Kirkcolm          |
| 5   | 4                                           | 0.8                                      | 2.4     | 0.01                       | 0.1      | Shinnel Glenlee   |
| 6   | 5                                           | 0.8                                      | 2.4     | 0.01                       | 0.1      | Neoproterozoic    |
| 7   | 6                                           | 0.7                                      | 2.1     | 0.01                       | 0.1      | Inverclyde        |
| 8   | 7                                           | 0.1                                      | 1.4     | 0.0005                     | 0.05     | Southern highland |
| 9   | 8                                           | 0.7                                      | 2.1     | 0.01                       | 0.1      | Stewertry         |
| 10  | 9                                           | 50                                       | 200     | 0.0002                     | 0.02     | Gala              |
| 11  | 10                                          | 390                                      | 600     | 0.0075                     | 0.1      | Neogene           |
| 12  | 101                                         | 2                                        | 50      | 0.014                      | 0.1      | Permian           |
| 13  | 13                                          | 40                                       | 700     | 0.0005                     | 0.05     | Lambeth group     |
| 14  | 15                                          | 0.2                                      | 45      | 0.006                      | 0.1      | Carboniferous     |
| 15  | 16                                          | 45                                       | 135     | 0.0001                     | 0.01     | Thanet sand       |
| 16  | 18                                          | 0.5                                      | 3.5     | 0.006                      | 0.1      | Teign valley      |
| 17  | 19                                          | 0.3                                      | 0.9     | 0.00004                    | 0.004    | Appin_group       |
| 18  | 22                                          | 25                                       | 75      | 0.000014                   | 0.0014   | Wealden group     |
| 19  | 23                                          | 10                                       | 51      | 0.005                      | 0.1      | Upper_devonian    |
| 20  | 24                                          | 105                                      | 1400    | 0.002                      | 0.1      | Great Oolite      |
| 21  | 25                                          | 10                                       | 1000    | 0.005                      | 0.1      | Border group      |
| 22  | 27                                          | 0.5                                      | 1.5     | 0.001                      | 0.1      | Crawford_moffat   |
| 23  | 28                                          | 3                                        | 11000   | 0.00005                    | 0.005    | Inferior Oolite   |
| 24  | 29                                          | 0.05                                     | 0.15    | 0.002                      | 0.1      | Amphill clay      |
| 25  | 30                                          | 1                                        | 45      | 0.002                      | 0.1      | Dinantian_rock    |
| 26  | 31                                          | 1                                        | 3000    | 0.0008                     | 0.08     | Landrovery        |
| 27  | 32                                          | 33                                       | 3400    | 0.00006                    | 0.006    | Lower greensand   |
| 28  | 33                                          | 1                                        | 275     | 0.001                      | 0.1      | Triassic_rock     |
| 29  | 34                                          | 8.5                                      | 25.5    | 0.02                       | 0.1      | Ravenscar         |
| 30  | 35                                          | 0.05                                     | 0.15    | 0.006                      | 0.1      | Oxford clay       |
| 31  | 36                                          | 1                                        | 45      | 0.001                      | 0.1      | Dinantian         |
| 32  | 37                                          | 150                                      | 450     | 0.000064                   | 0.0064   | Warwickshire      |
| 33  | 38                                          | 9                                        | 39      | 0.00015                    | 0.015    | Lias              |
| 34  | 39                                          | 5                                        | 15      | 8E-08                      | 0.000008 | Riccarton         |
| 35  | 40                                          | 5                                        | 15      | 8E-08                      | 0.000008 | Argyll            |

|    |     |      |      |          |        |                        |
|----|-----|------|------|----------|--------|------------------------|
| 36 | 42  | 150  | 450  | 0.005    | 0.1    | Zechstein              |
| 37 | 43  | 695  | 700  | 0.00005  | 0.005  | Corallian              |
| 38 | 134 | 1.6  | 43   | 0.000004 | 0.0004 | Pennine coal           |
| 39 | 46  | 0.3  | 1.1  | 0.0001   | 0.01   | Metasedimentary        |
| 40 | 47  | 2    | 4000 | 0.0005   | 0.05   | Ecocene                |
| 41 | 48  | 380  | 1500 | 0.0015   | 0.1    | Grey chalk             |
| 42 | 98  | 10   | 51   | 0.005    | 0.1    | Silurian               |
| 43 | 50  | 0.5  | 1.5  | 0.002    | 0.1    | Hawick                 |
| 44 | 51  | 1    | 3    | 0.018    | 0.1    | Yoredale               |
| 45 | 53  | 25   | 75   | 0.018    | 0.1    | Clackmannan            |
| 46 | 62  | 0.3  | 1.1  | 0.0005   | 0.05   | Ordovician             |
| 47 | 55  | 10   | 522  | 0.0005   | 0.05   | Thames                 |
| 48 | 56  | 10   | 51   | 0.0005   | 0.05   | Devonian               |
| 49 | 57  | 10   | 51   | 0.005    | 0.1    | Ludlow                 |
| 50 | 59  | 17.5 | 52.5 | 0.0002   | 0.02   | Arbuthnott_Garvock     |
| 51 | 60  | 17   | 124  | 0.005    | 0.1    | Bracklesham            |
| 52 | 61  | 0.3  | 1.1  | 0.0005   | 0.05   | Llanvirn               |
| 53 | 64  | 18   | 775  | 0.005    | 0.1    | Solent                 |
| 54 | 65  | 7.5  | 22.5 | 0.000002 | 0.0002 | Portland               |
| 55 | 66  | 400  | 1200 | 0.0002   | 0.02   | Strathclyde            |
| 56 | 67  | 0.2  | 245  | 0.001    | 0.1    | Silesian               |
| 57 | 69  | 2.5  | 150  | 0.001    | 0.1    | Cambrian               |
| 58 | 70  | 25.5 | 76.5 | 0.001    | 0.1    | Lower_Devonian         |
| 59 | 71  | 0.3  | 1.1  | 0.0005   | 0.05   | Caradoc                |
| 60 | 72  | 0.3  | 1.1  | 0.0005   | 0.05   | Ashgill                |
| 61 | 73  | 43   | 43   | 0.00002  | 0.002  | Millstone grit         |
| 62 | 74  | 238  | 772  | 0.0075   | 0.1    | Quaternary             |
| 63 | 77  | 45   | 135  | 0.0006   | 0.06   | Upper_cambrian         |
| 64 | 79  | 380  | 1500 | 0.0015   | 0.1    | White chalk            |
| 65 | 82  | 7.5  | 22.5 | 0.005    | 0.1    | Wenlock                |
| 66 | 83  | 100  | 300  | 0.00001  | 0.001  | Paleogene              |
| 67 | 84  | 0.7  | 2.1  | 0.01     | 0.1    | Metamorphic            |
| 68 | 85  | 10   | 51   | 0.005    | 0.1    | Pridoli                |
| 69 | 89  | 300  | 500  | 0.0003   | 0.03   | Purbeck limestone      |
| 70 | 90  | 4    | 53   | 0.0005   | 0.05   | New red sandstone      |
| 71 | 92  | 25   | 75   | 0.00005  | 0.005  | Stratheden             |
| 72 | 94  | 250  | 750  | 0.01     | 0.1    | Scottish_coal_measures |
| 73 | 95  | 25.5 | 76.5 | 0.0005   | 0.05   | Lanark                 |
| 74 | 96  | 0.25 | 0.75 | 0.0005   | 0.05   | Tappins                |
| 75 | 97  | 5.5  | 16.5 | 0.000007 | 0.0007 | South Wales upper coal |

|     |     |      |      |         |       |                         |
|-----|-----|------|------|---------|-------|-------------------------|
| 76  | 99  | 40   | 120  | 0.002   | 0.1   | Bowland High            |
| 77  | 102 | 0.3  | 1.1  | 0.0005  | 0.05  | Tremadoc                |
| 78  | 106 | 0.25 | 0.75 | 0.0005  | 0.05  | Arenig                  |
| 79  | 109 | 0.25 | 0.75 | 0.0005  | 0.05  | Highland_border_complex |
| 80  | 111 | 25.5 | 76.5 | 0.0005  | 0.05  | Appleby                 |
| 81  | 112 | 25.5 | 76.5 | 0.0005  | 0.05  | Reston                  |
| 82  | 114 | 45   | 135  | 0.0006  | 0.06  | Cambrian_Ordovician     |
| 83  | 115 | 4.59 | 75   | 0.0001  | 0.01  | Mercia mudstone         |
| 84  | 116 | 0.25 | 0.75 | 0.0005  | 0.05  | Patrick_Glenwhargen     |
| 85  | 118 | 0.25 | 0.75 | 0.0005  | 0.05  | Leadhills               |
| 86  | 119 | 5    | 15   | 0.001   | 0.1   | Holsworthy              |
| 87  | 120 | 0.7  | 2.1  | 0.01    | 0.1   | Black craig             |
| 88  | 128 | 275  | 825  | 0.0015  | 0.1   | Hunstanton              |
| 89  | 131 | 17   | 51   | 0.0002  | 0.02  | Strahmore               |
| 90  | 137 | 49   | 157  | 0.01    | 0.1   | Fell sandstone          |
| 91  | 138 | 33   | 3400 | 0.003   | 0.1   | Hibernian greensand     |
| 92  | 139 | 93   | 410  | 0.00001 | 0.001 | Sherwood sandstone      |
| 93  | 141 | 0.5  | 1.5  | 0.001   | 0.1   | Armagh                  |
| 94  | 142 | 0.5  | 1.5  | 0.001   | 0.1   | Belfast                 |
| 95  | 143 | 0.5  | 1.5  | 0.001   | 0.1   | Tyrone                  |
| 96  | 146 | 0.5  | 1.5  | 0.001   | 0.1   | Enler                   |
| 97  | 147 | 0.5  | 1.5  | 0.001   | 0.1   | Leitrim                 |
| 98  | 149 | 0.5  | 1.5  | 0.001   | 0.1   | Hollywood               |
| 99  | 150 | 0.5  | 1.5  | 0.001   | 0.1   | Cross_slieve            |
| 100 | 151 | 0.5  | 1.5  | 0.001   | 0.1   | Red bay                 |
| 101 | 177 | 1.8  | 600  | 0.0003  | 0.03  | Bridport sand           |

### Text S7. Spatial maps of model performance

120 Figure S6 presents the spatial maps of model performance during calibration period using two calibration approaches. Spatial maps of coupled model performance for KGE correlation and flow duration curve (FDC) components are presented in Figure S7 under two calibration approaches (catchment-by-catchment and national consistency) for both the calibration and evaluation periods.

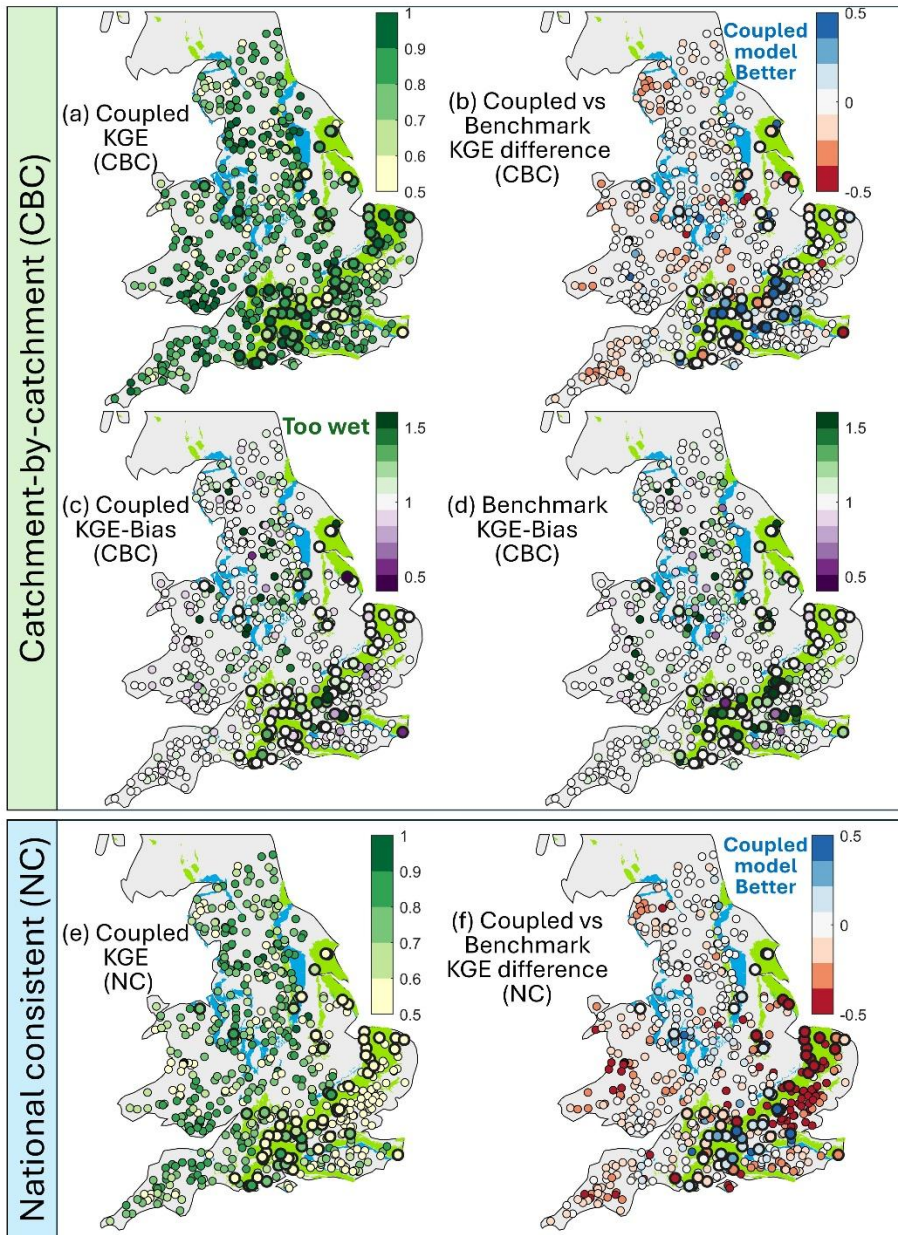

125 **Figure S6: Spatial maps of model performance using two calibration approaches (a) Catchment-by-catchment (CBC),**  
 (d) national-consistent (NC), the non-parametric KGE differences between the coupled model and the corresponding  
 DECIPHeR-MPR benchmark runs (b, e), and the bias component of KGE for the coupled model and benchmark  
 runs under catchment-by-catchment approach (c, f). Each dot represents the performance at a river gauge during the  
 130 calibration period. The scatter dots for groundwater-dominated catchments (baseflow index > 0.75) were outlined  
 with thicker borders. The background of the maps highlights the areas of high productivity in aquifers. Light green  
 represents the fractures flow highly productive aquifer, while blue indicates the intergranular flow highly productive  
 aquifer.

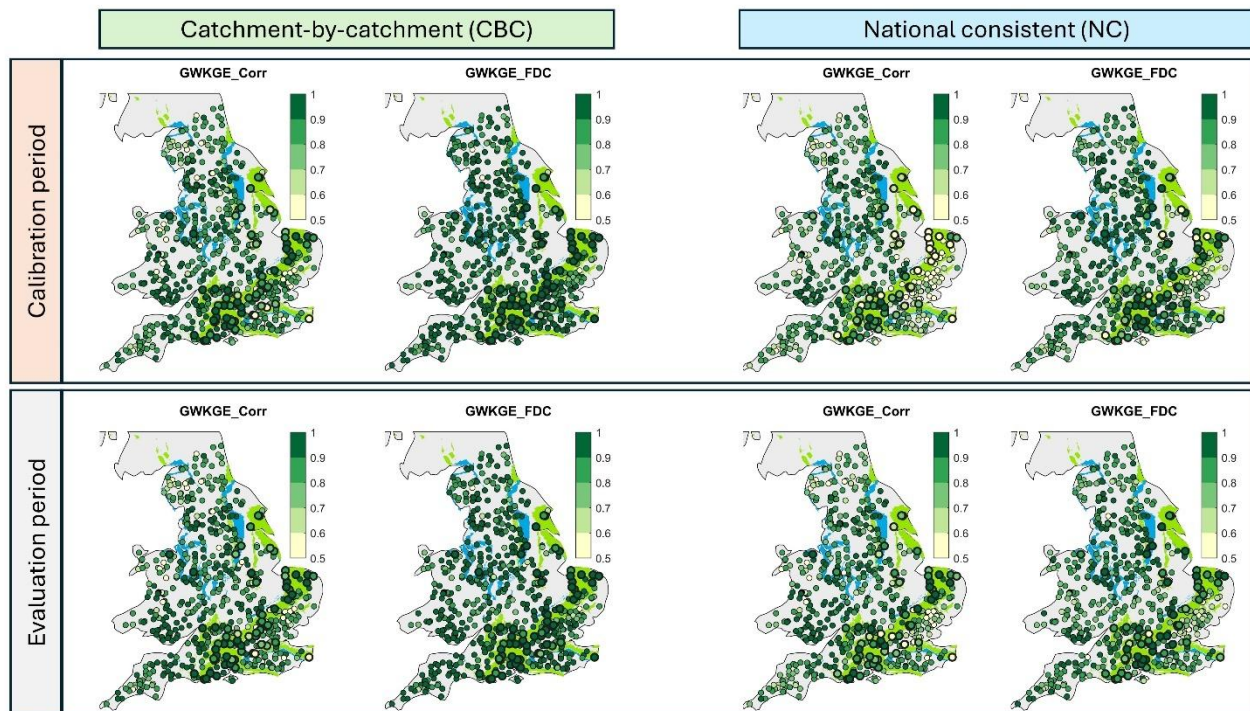

135 **Figure S7: Spatial maps of the coupled model performance for KGE correlation and flow duration curve (FDC) component under two calibration approaches (catchment-by-catchment/national consistent) during calibration/evaluation period.**

#### Text S8. Details of internal variables for the wet catchment 67005 during 2010-2012

Figure S8 shows the simulation results of the internal variable changes, including actual PET, root zone storage, recharge, saturated excess flow  $Q_{EX}$ , groundwater discharge  $Q_{GWDs}$  and also simulated groundwater heads and streamflow, for HRU 11 in catchment 67005 from 2010 to 2012. Based on Figure S8e, it can be observed that since the groundwater system is near saturation, the groundwater head remains above the bottom of the root zone, fluctuating between it and the topography surface. Therefore, under such conditions, no recharge occurs. As soon as the root zone becomes saturated, the saturated excess flow  $Q_{EX}$  is generated, which is the main component of the streamflow in this catchment (Figure S8f). According to  
140  
145 Figure S8g, it is observed that the simulated hydrograph contains more pronounced spikes compared to the observations.

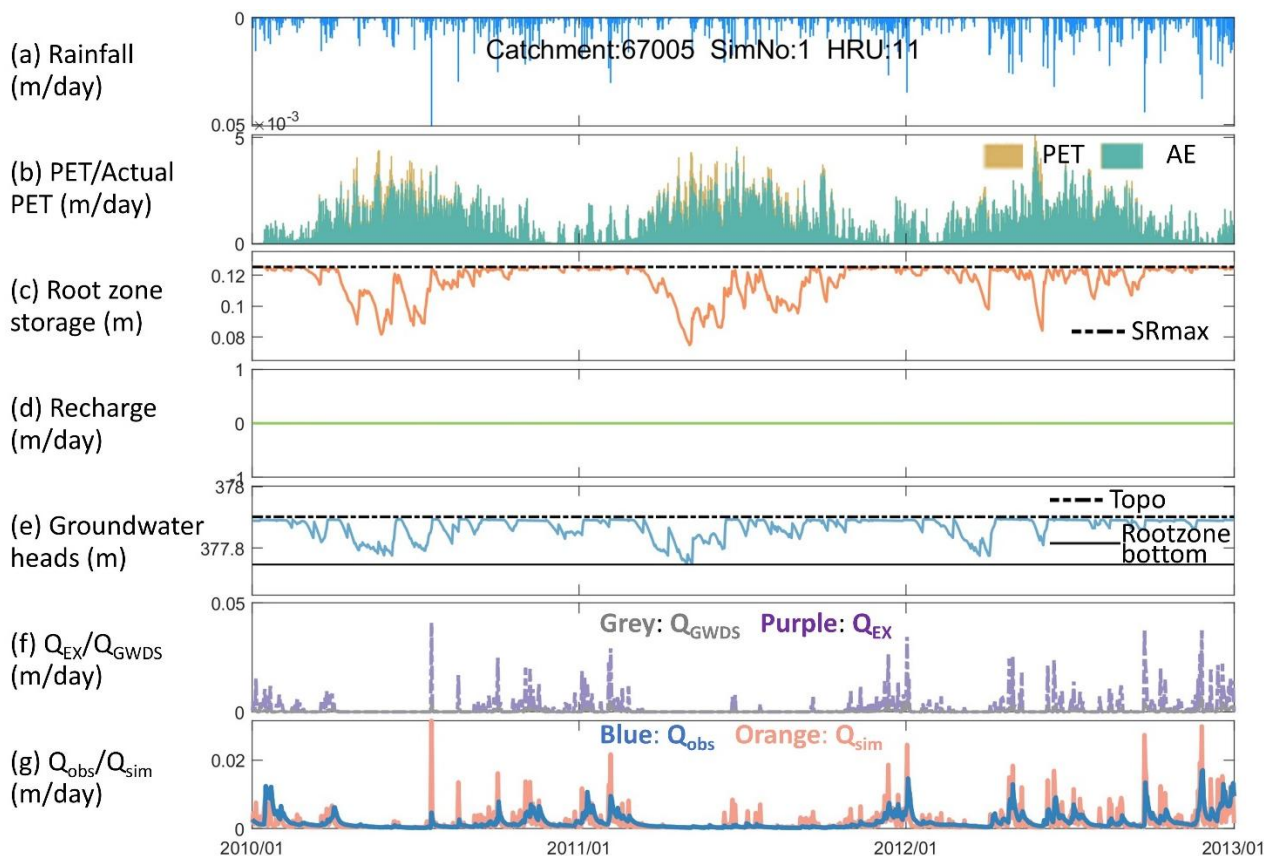

**Figure S8: Internal variables for the wet catchment 67005 during 2010-2012.**

**Text S9 Investigation of factors explaining the poor performance of groundwater simulations**

Figure S9 investigated six factors that might explain the poor performance of groundwater simulations, including short groundwater observation records, low streamflow accuracy in catchments, distance between wells from rivers or attributes such as borehole depth, elevation of well, and grid elevation. The results reveal that borehole depth ( $R=-0.25$ ), river proximity ( $R=0.19$ ), and streamflow accuracy ( $R=0.17$ ) are relatively the key factors affecting the groundwater simulation with the  $p$ -value  $< 0.001$ . This indicates that the coupled model is more challenging to accurately simulate the temporal patterns of groundwater for wells with deeper boreholes, those located closer to the river, or where streamflow simulation accuracy is lower.

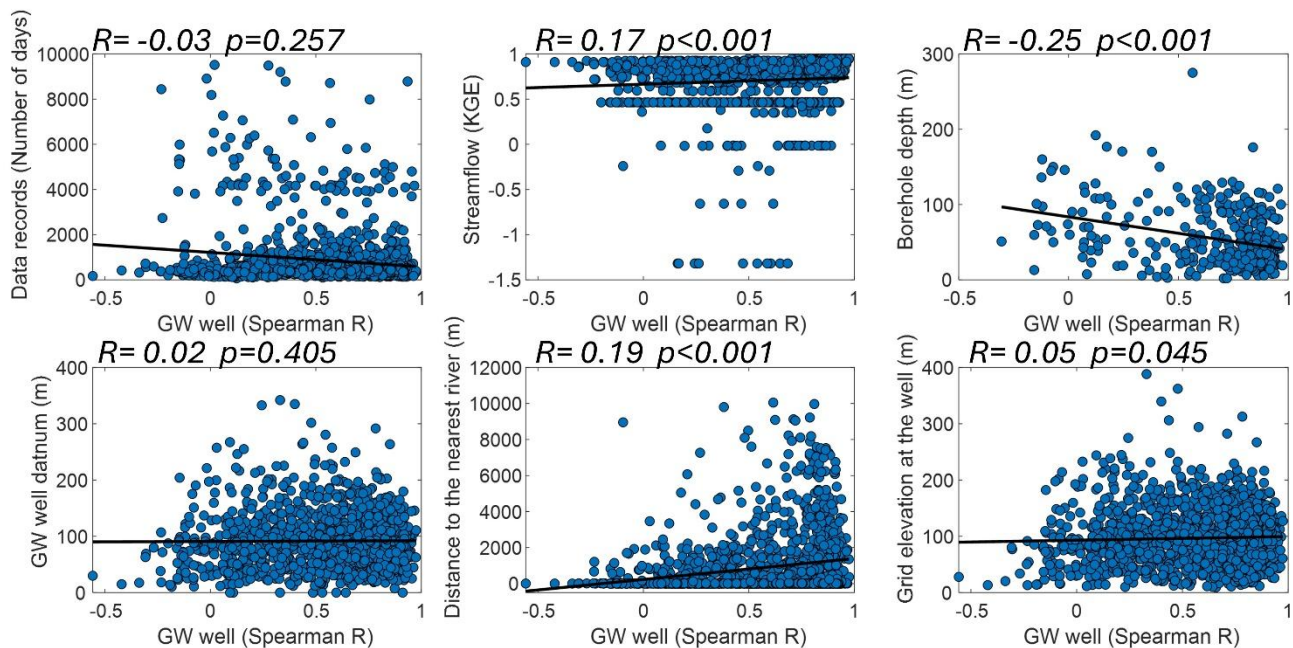

**Figure S9: Factors explaining the poor performance of groundwater simulations. X-axis indicates the Spearman correlation coefficients calculated for comparing observed and simulated groundwater levels.**

#### 160 Text S10. Model parameter sensitivity analysis results

To further investigate the sensitivity of model parameters and their impact on simulated flows and groundwater levels, a controlled experiment was conducted in a groundwater-dominated chalk catchment as a case study (catchment ID: 39028, details provided in Table 4). For each model parameter, 1000 simulations were performed by sampling within the specified ranges for the selected parameter while keeping the other parameters at their default values. This approach facilitated a visual  
 165 assessment of parameter sensitivity and enabled the verification of the model's functional performance, ensuring it operates in a physically meaningful manner.

The CHV parameter, channel routing velocity, showed insensitive in this relatively small catchment, which is consistent with previous studies (Coxon et al., 2019; Lane et al., 2021; Lane, 2021). Therefore, only the effects of the remaining five model parameters on the results are presented here. Overall, model parameters related to surface water components, such as  $SR_{max}$ ,  
 170 B, and Ks, exert a greater influence on simulated flows, whereas parameters like T and Sy have a more significant effect on simulated groundwater levels, as illustrated in Figures S10-S13.

$SR_{max}$ , which governs root zone storage, plays a crucial role in regulating the flashiness of simulated flows (Figure S10a). Smaller  $SR_{max}$  values lead to increased variability in runoff, as runoff is rapidly generated whenever  $SR_{max}$  reaches its capacity, causing spikes in the hydrographs due to excess rainfall. Conversely, a larger  $SR_{max}$ , which indicates a greater root

175 zone storage capacity, results in a smoother flow hydrograph. Both B and Ks are model parameters that control recharge magnitude, with smaller values of either parameter leading to reduced recharge. As shown in Figure S10b, smaller B values lead to reduced recharge, causing the root zone storage to fill up more quickly and resulting in increased overflow and greater variability in runoff. The performance of Ks and B is generally consistent (Figure S10b and c), though B has a relatively greater impact.

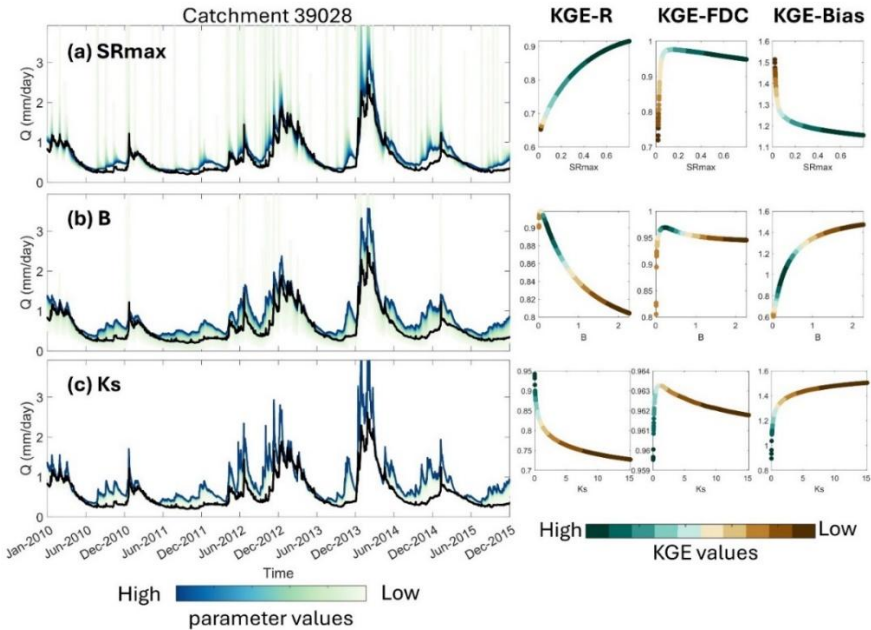

180 **Figure S10: Demonstrating the influence of SRmax, B and Ks model parameters on the hydrograph through one-at-a-time sampling for the Dun at Hungerford (39028).** In the left panel, each row illustrates the effects of varying one model parameter on hydrographs while all other parameters are held constant. Hydrographs are color-coded to represent the relative values of the varying parameters, ranging from low (green) to high (blue). In the right panel, the impact of parameter changes on KGE and its three components for simulated flows is illustrated. The effects of T and Sy parameters on the hydrograph are provided in the supporting information (Figure S11).

185

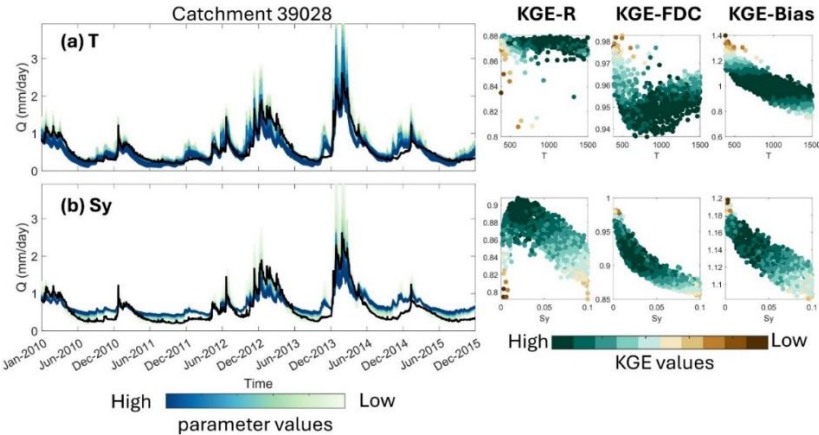

Figure S11: Demonstrating the influence of T and Sy model parameters on the hydrograph through one-at-a-time sampling for the Dun at Hungerford (39028). In the left panel, each row illustrates the effects of varying one model parameter on hydrographs while all other parameters are held constant. Hydrographs are color-coded to represent the relative values of the varying parameters, ranging from low (green) to high (blue). In the right panel, the impact of parameter changes on KGE and its three components for simulated flows is illustrated.

T and Sy are more crucial in controlling the simulation of groundwater levels (Figure S12). If the T is high, groundwater levels are generally lower. This is because a higher T facilitates easier movement of lateral groundwater flow through the aquifer, reducing the accumulation of water and consequently lowering the groundwater levels. Our results, which demonstrate the same pattern that higher T values reduce groundwater levels (Figure S12a), prove our model works effectively. Compared to T, the impact of Sy on groundwater levels is relatively weak. Figure S12b presents that smaller Sy values lead to higher variability in groundwater levels. When Sy is low, the regulation and storage capacity of the aquifer weaken, making groundwater levels more prone to fluctuations and thereby increasing their variability. These results illustrate the effects of varying individual parameters on the simulation outputs, without accounting for interactions between parameters. This analysis aims to offer a general understanding of how these parameters influence model outputs and to verify that the coupled model is operating properly. Since the testing method is simple and only results for a single geological condition are presented here, the findings should not be overinterpreted. More detailed analysis of the model parameter sensitivity analysis is suggested in future research.

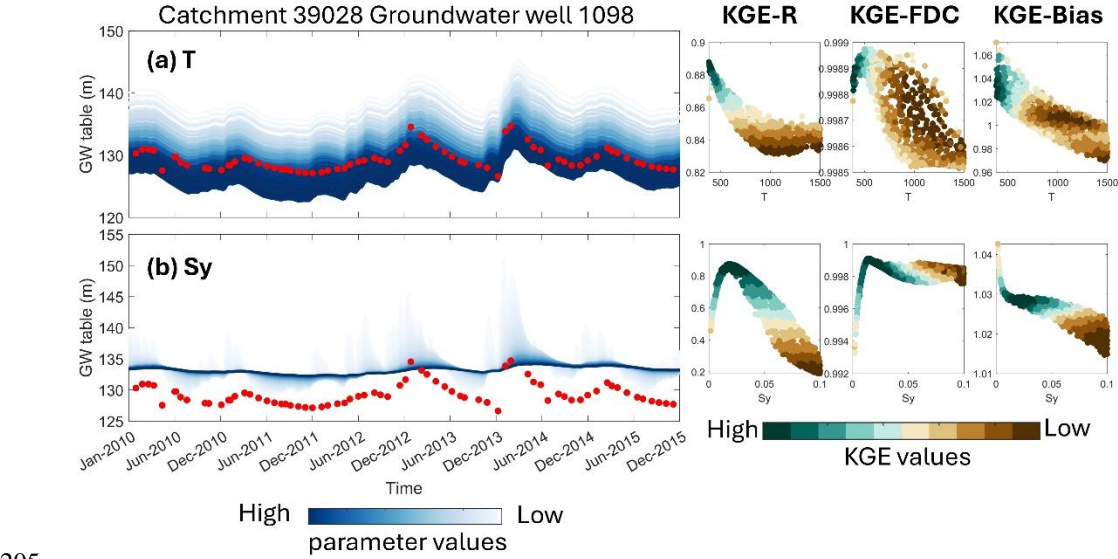

Figure S12: Demonstrating the influence of T and Sy model parameters on the simulated groundwater levels through one-at-a-time sampling for the Dun at Hungerford (39028). The left panel shows how varying each model parameter affects groundwater levels while keeping all other parameters constant. Groundwater levels are color-coded to reflect the relative values of the changing parameters, ranging from low (light blue) to high (dark blue). The right panel illustrates the impact of parameter variations on KGE and its three components for simulated groundwater levels. The effects of the SRmax, B, and Ks parameters on groundwater levels are detailed in the supporting information (Figure S13).

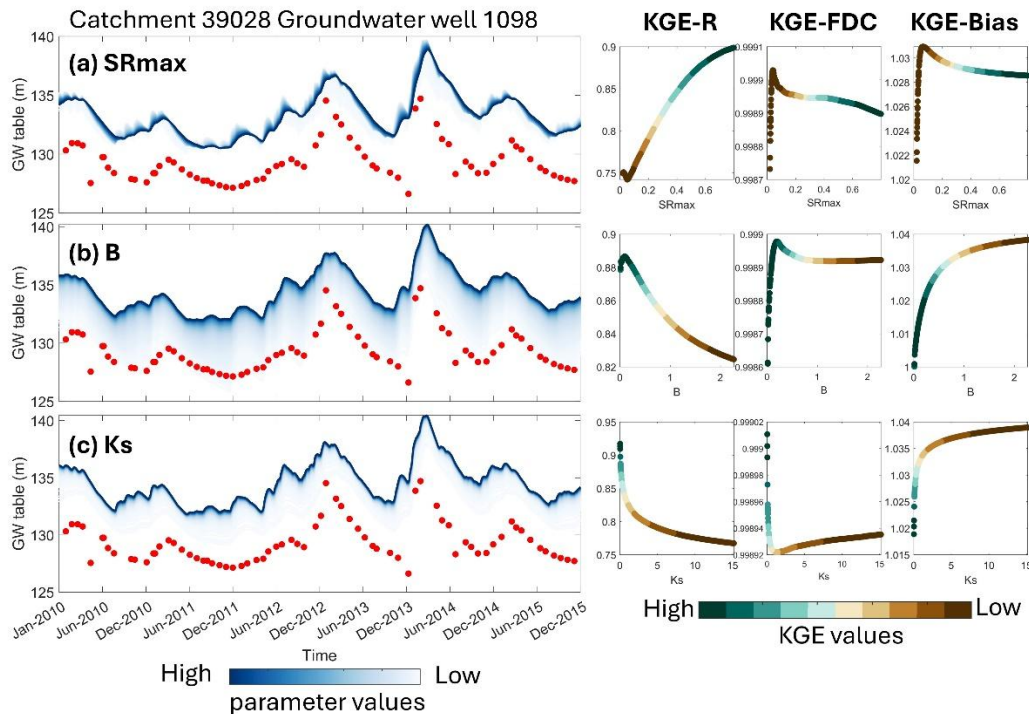

215 **Figure S13: Demonstrating the influence of SRmax, B and Ks model parameters on the simulated groundwater levels through one-at-a-time sampling for the Dun at Hungerford (39028).** The left panel shows how varying each model parameter affects groundwater levels while keeping all other parameters constant. Groundwater levels are color-coded to reflect the relative values of the changing parameters, ranging from low (light blue) to high (dark blue). The right panel illustrates the impact of parameter variations on KGE and its three components for simulated groundwater levels.

## 220 **Text S11. Examples for determining the buffer zone threshold in this study**

Figure S14 illustrates the impact of different buffer thresholds on the hydrographs for the 29 km<sup>2</sup> catchment 39049 as an example. Notably, when no buffer threshold is applied or when a large 10 km buffer zone is used, the simulations tend to either overestimate or underestimate the observed hydrographs, respectively. In both cases, the KGE performance is also poor (less than 0.6, as shown in Table S4). These results highlight the importance of setting an appropriate buffer zone.

225 Without a buffer, the model is affected by the no-flow boundary condition, where no water can move across the boundary and leave the groundwater system, leading to the potential buildup of water in the adjacent cells of the lateral boundaries. Conversely, a large buffer zone, where no rainfall or recharge will be considered and generated in the domain, results in an underestimation of the catchment's runoff.

According to the example in Figure S14, as the buffer zone increases from 0 to 5 km, the KGE reaches its optimal value with

230 a 3 km buffer, where the simulated hydrograph matches the observed data well. A 3km buffer zone ensures that the results

are less influenced by no-flow boundary conditions while avoiding an excessively large simulation domain, leading to more reasonable simulation outcomes. Additionally, users can adjust this buffer value as needed.

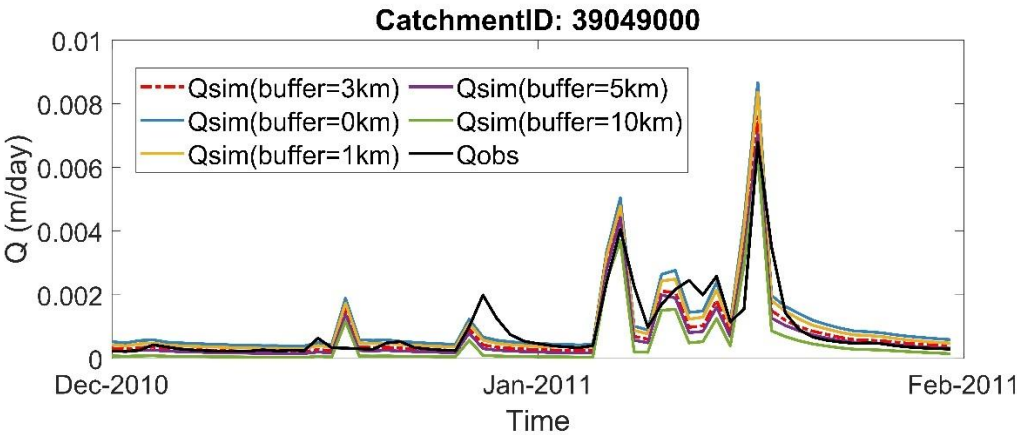

**Figure S14: Demonstrating the influence of varying buffer thresholds on the hydrographs. The red dashed line shows the hydrograph with a 3 km buffer that were determined in this study.**

**Table S4. The KGE values for the simulations with different buffer thresholds**

| Catchment<br>39049 | Buffer=3 km (used<br>in this study) | Buffer=0 km | Buffer=1 km | Buffer=5 km | Buffer=10 km |
|--------------------|-------------------------------------|-------------|-------------|-------------|--------------|
| KGE                | 0.73                                | 0.53        | 0.64        | 0.71        | 0.57         |

**Text S12. Examples of poor groundwater level simulations at low-elevation grids due to lack of river representation in groundwater model**

Since our groundwater model does not have the represent river grids and assumes that whenever the groundwater level exceeds the topography surface, the portion of groundwater above the surface is converted into groundwater discharge and passed to nearby rivers. In some low-elevation groundwater grids, due to groundwater discharge generated at every time step and the excess water is transferred, causing the groundwater level in that grid to remain at the surface (Figure S15). This does not effectively simulate the dynamic changes in groundwater levels, which is a limitation of our model that needs to be further improved.

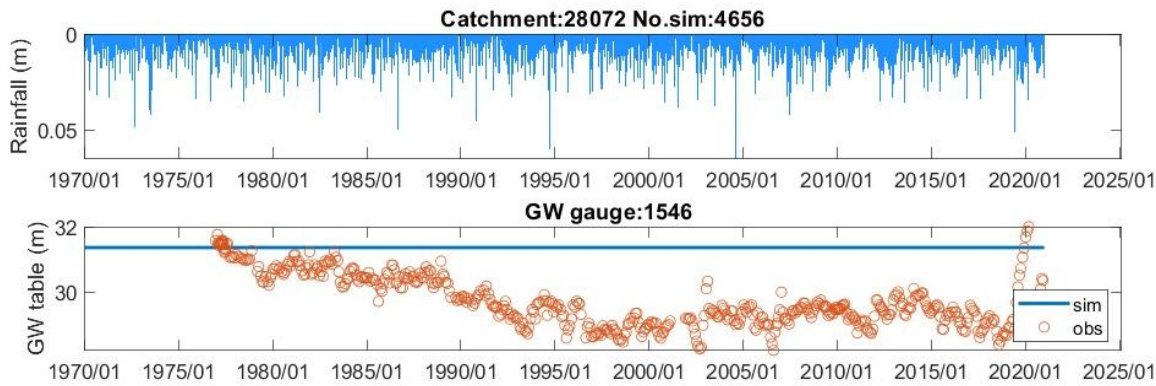

**Figure S15: Examples of simulated groundwater levels stay at the topography surface in low-elevation grids.**

## References

- 250 Ala-aho, P., Soulsby, C., Wang, H., and Tetzlaff, D.: Integrated surface-subsurface model to investigate the role of groundwater in headwater catchment runoff generation: A minimalist approach to parameterisation, *Journal of Hydrology*, 547, 664-677, 2017.
- Bailey, R. T., Wible, T. C., Arabi, M., Records, R. M., and Ditty, J.: Assessing regional-scale spatio-temporal patterns of groundwater–surface water interactions using a coupled SWAT-MODFLOW model, *Hydrological processes*, 30, 4420-4433, 2016.
- 255 Batelis, S. C., Rahman, M., Kollet, S., Woods, R., and Rosolem, R.: Towards the representation of groundwater in the Joint UK Land Environment Simulator, *Hydrological processes*, 34, 2843-2863, 2020.
- Brunner, P. and Simmons, C. T.: HydroGeoSphere: A Fully Integrated, Physically Based Hydrological Model, *Groundwater*, 50, 170-176, <https://doi.org/10.1111/j.1745-6584.2011.00882.x>, 2012.
- 260 Clapp, R. B. and Hornberger, G. M.: Empirical equations for some soil hydraulic properties, *Water resources research*, 14, 601-604, 1978.
- Coxon, G., Freer, J., Lane, R., Dunne, T., Knoben, W. J., Howden, N. J., Quinn, N., Wagener, T., and Woods, R.: DECIPHER v1: dynamic fluxEs and connectivity for predictions of HydRology, *Geoscientific Model Development*, 12, 2285-2306, 2019.
- 265 de Graaf, I. E., van Beek, R. L., Gleeson, T., Moosdorf, N., Schmitz, O., Sutanudjaja, E. H., and Bierkens, M. F.: A global-scale two-layer transient groundwater model: Development and application to groundwater depletion, *Advances in water Resources*, 102, 53-67, 2017.
- Ewen, J., Parkin, G., and O'Connell, P. E.: SHETRAN: distributed river basin flow and transport modeling system, *Journal of hydrologic engineering*, 5, 250-258, 2000.
- 270 Flipo, N., Gallois, N., and Schuite, J.: Regional coupled surface–subsurface hydrological model fitting based on a spatially distributed minimalist reduction of frequency domain discharge data, *Geoscientific Model Development*, 16, 353-381, 2023.
- Gascoin, S., Ducharne, A., Ribstein, P., Carli, M., and Habets, F.: Adaptation of a catchment-based land surface model to the hydrogeological setting of the Somme River basin (France), *Journal of Hydrology*, 368, 105-116, 2009.
- Griffiths, J., Yang, J., Woods, R., Zammit, C., Porhemmat, R., Shankar, U., Rajanayaka, C., Ren, J., and Howden, N.: Parameterization of a National Groundwater Model for New Zealand, *Sustainability*, 15, 13280, 2023.
- 275 Guillaumot, L., Smilovic, M., Burek, P., De Bruijn, J., Greve, P., Kahil, T., and Wada, Y.: Coupling a large-scale hydrological model (CWatM v1. 1) with a high-resolution groundwater flow model (MODFLOW 6) to assess the impact of irrigation at regional scale, *Geoscientific Model Development*, 15, 2022.

- Guimberteau, M., Ducharne, A., Ciais, P., Boisier, J. P., Peng, S., De Weirtdt, M., and Verbeeck, H.: Testing conceptual and physically based soil hydrology schemes against observations for the Amazon Basin, *Geosci. Model Dev.*, 7, 1115-1136, 10.5194/gmd-7-1115-2014, 2014.
- Jing, M., Heße, F., Kumar, R., Wang, W., Fischer, T., Walther, M., Zink, M., Zech, A., Samaniego, L., and Kolditz, O.: Improved regional-scale groundwater representation by the coupling of the mesoscale Hydrologic Model (mHM v5. 7) to the groundwater model OpenGeoSys (OGS), *Geoscientific Model Development*, 11, 1989-2007, 2018.
- Lane, R. A.: National-scale hydrological modelling of high flows across Great Britain: multi-model structures, regionalisation approaches and climate change analysis with uncertainty, University of Bristol, 2021.
- Lane, R. A., Freer, J. E., Coxon, G., and Wagener, T.: Incorporating uncertainty into multiscale parameter regionalization to evaluate the performance of nationally consistent parameter fields for a hydrological model, *Water Resources Research*, 57, e2020WR028393, 2021.
- Markstrom, S. L., Niswonger, R. G., Regan, R. S., Prudic, D. E., and Barlow, P. M.: GSFLOW-Coupled Ground-water and Surface-water FLOW model based on the integration of the Precipitation-Runoff Modeling System (PRMS) and the Modular Ground-Water Flow Model (MODFLOW-2005), *US Geological Survey techniques and methods*, 6, 240, 2008.
- Maxwell, R., Condon, L., and Kollet, S.: A high-resolution simulation of groundwater and surface water over most of the continental US with the integrated hydrologic model ParFlow v3, *Geoscientific model development*, 8, 923-937, 2015.
- Müller Schmied, H., Eisner, S., Franz, D., Wattenbach, M., Portmann, F. T., Flörke, M., and Döll, P.: Sensitivity of simulated global-scale freshwater fluxes and storages to input data, hydrological model structure, human water use and calibration, *Hydrol. Earth Syst. Sci.*, 18, 3511-3538, 10.5194/hess-18-3511-2014, 2014.
- Naz, B. S., Sharples, W., Ma, Y., Goergen, K., and Kollet, S.: Continental-scale evaluation of a fully distributed coupled land surface and groundwater model ParFlow-CLM (v3. 6.0) over Europe, *Geoscientific Model Development Discussions*, 2022, 1-29, 2022.
- Ng, G.-H. C., Wickert, A. D., Somers, L. D., Saberi, L., Cronkite-Ratcliff, C., Niswonger, R. G., and McKenzie, J. M.: GSFLOW-GRASS v1. 0.0: GIS-enabled hydrologic modeling of coupled groundwater-surface-water systems, *Geoscientific Model Development*, 11, 4755-4777, 2018.
- Parkin, G., Birkinshaw, S., Younger, P., Rao, Z., and Kirk, S.: A numerical modelling and neural network approach to estimate the impact of groundwater abstractions on river flows, *Journal of Hydrology*, 339, 15-28, 2007.
- Rahman, M., Pianosi, F., and Woods, R.: Simulating spatial variability of groundwater table in England and Wales, *Hydrological Processes*, 37, e14849, 2023.
- Rawls, W. J., Brakensiek, D. L., and Saxton, K.: Estimation of soil water properties, *Transactions of the ASAE*, 25, 1316-1320, 1982.
- Reilly, T. E. and Harbaugh, A. W.: Guidelines for evaluating ground-water flow models, DIANE Publishing 2004.
- Reinecke, R., Foglia, L., Mehl, S., Trautmann, T., Cáceres, D., and Döll, P.: Challenges in developing a global gradient-based groundwater model (G 3 M v1. 0) for the integration into a global hydrological model, *Geoscientific Model Development*, 12, 2401-2418, 2019.
- Verkaik, J., Sutanudjaja, E. H., Oude Essink, G. H., Lin, H. X., and Bierkens, M. F.: GLOBGM v1. 0: a parallel implementation of a 30 arcsec PCR-GLOBWB-MODFLOW global-scale groundwater model, *Geoscientific Model Development Discussions*, 2022, 1-27, 2022.
- Yang, J., McMillan, H., and Zammit, C.: Modeling surface water-groundwater interaction in New Zealand: model development and application, *Hydrological Processes*, 31, 925-934, 2017.
